# Supplementary material for: Modifying bacterial cellulose dispersions with deep eutectic solvent and pectin to tune the properties of open-celled foams
Source: Royal Society of Chemistry journal article supplement (doi:10.1039/d4lp00348a), 2024-12-26
Supplement: d4lp00348a1.pdf [file d4lp00348a1.pdf]

# Supporting Information

## Modifying Bacterial Cellulose Dispersions with Deep Eutectic Solvent and Pectin to Tune the Properties of Open-Celled Foams

Hareesh Iyer, Aban Mandal, Michael Holden, and Eleftheria Roumeli\*

*Department of Materials Science and Engineering, University of Washington, Seattle, WA,  
USA*

E-mail: eroumeli@uw.edu

This Supplementary Information contains:

- Supplementary Tables to
- Supplementary Figures

## List of Figures

|     |                                                             |    |
|-----|-------------------------------------------------------------|----|
| S1  | FTIR CADES Fail . . . . .                                   | 4  |
| S2  | SEM image . . . . .                                         | 4  |
| S3  | Cyclic NT vs DES . . . . .                                  | 5  |
| S4  | Frequency Sweeps . . . . .                                  | 6  |
| S5  | Creep DBC PTN . . . . .                                     | 7  |
| S6  | Creep-Recovery Test Recovered Viscoelastic Strain . . . . . | 7  |
| S7  | CADES-PTN Pore Sizes . . . . .                              | 8  |
| S8  | PTN Sweep . . . . .                                         | 9  |
| S9  | Plastics Stress-Strain . . . . .                            | 10 |
| S10 | UCS data . . . . .                                          | 11 |
| S11 | Recovery data . . . . .                                     | 12 |

## Supplementary Tables

Table S1: SAXS model fitting parameters.

| Sample      | scale | Bkg ( $\text{cm}^{-1}$ ) | $I_G$ ( $\text{cm}^{-1}$ ) | $I_L$ ( $\text{cm}^{-1}$ ) | $R_g$ ( $\text{\AA}$ ) | D    | $\xi$ ( $\text{\AA}$ ) |
|-------------|-------|--------------------------|----------------------------|----------------------------|------------------------|------|------------------------|
| DES BC      | 80.55 | 0.02                     | 320.76                     | 10.75                      | 3278.7                 | 3.24 | 219.88                 |
| BC          | 6.68  | -0.03                    | 7.50                       | 53393                      | 255.38                 | 2.49 | 4717.3                 |
| 20% Pectin  | 65.09 | 0.01                     | 247.1                      | 14.16                      | 2607.4                 | 3.13 | 258.34                 |
| 40% Pectin  | 8.37  | 0.02                     | 202.45                     | 81.19                      | 2149.8                 | 3.19 | 241.97                 |
| 60% Pectin  | 4.40  | 0.02                     | 152.03                     | 123.21                     | 1760.8                 | 3.18 | 256.1                  |
| 80% Pectin  | 3.85  | 0.01                     | 175.07                     | 95.81                      | 1955.8                 | 3.10 | 290.53                 |
| 100% Pectin | 2.86  | 0.01                     | 2.23                       | 654.9                      | 402.34                 | 2.46 | 2576.2                 |

Table S2: Power law fitting parameters of SAXS data

| Pectin % | Power | Scale | $R^2$ |
|----------|-------|-------|-------|
| 0.0      | 2.01  | 0.003 | 0.99  |
| 20.0     | 2.055 | 0.002 | 0.99  |
| 40.0     | 2.05  | 0.002 | 0.99  |
| 60.0     | 2.04  | 0.001 | 0.99  |
| 80.0     | 2.00  | 0.001 | 0.98  |
| 100.0    | 2.87  | 0.000 | 1.00  |

## Supplementary Figures

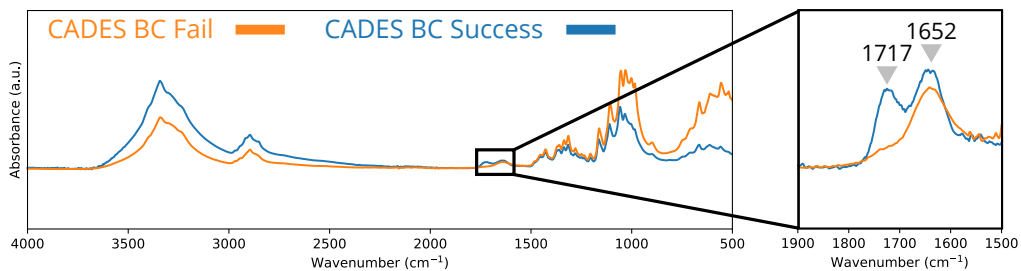

Figure S1: **FTIR of failed CADES treatment** FTIR spectra of two different batches of CADES-BC treated under the same conditions.

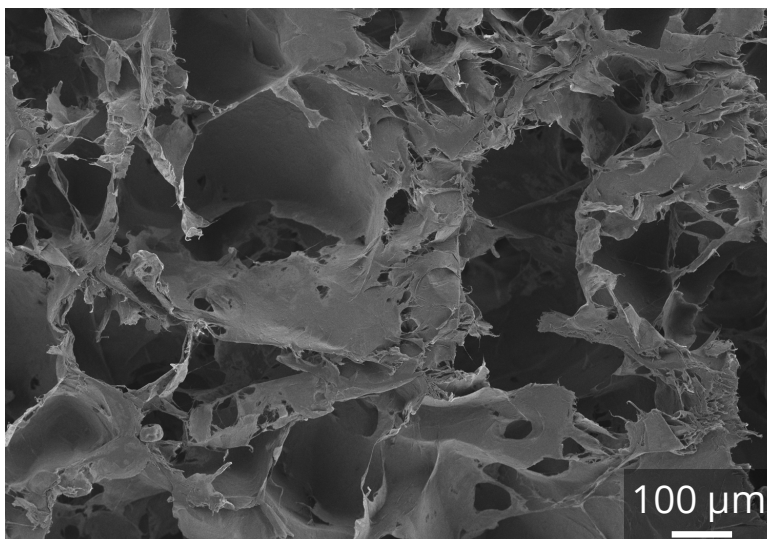

Figure S2: **BC Foam Cell** SEM image of CADES-BC foam at 100x.

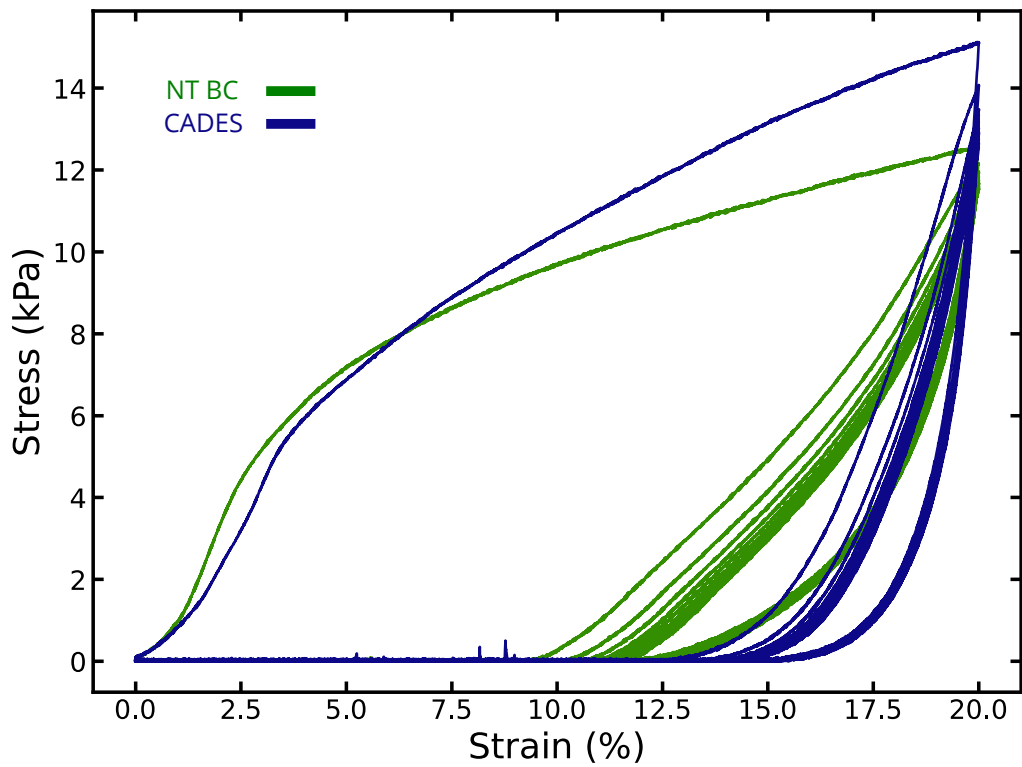

Figure S3: **Cyclic tests of NT vs CADES BC** Representative stress strain curves for NT and CADES BC samples under cyclic loading.

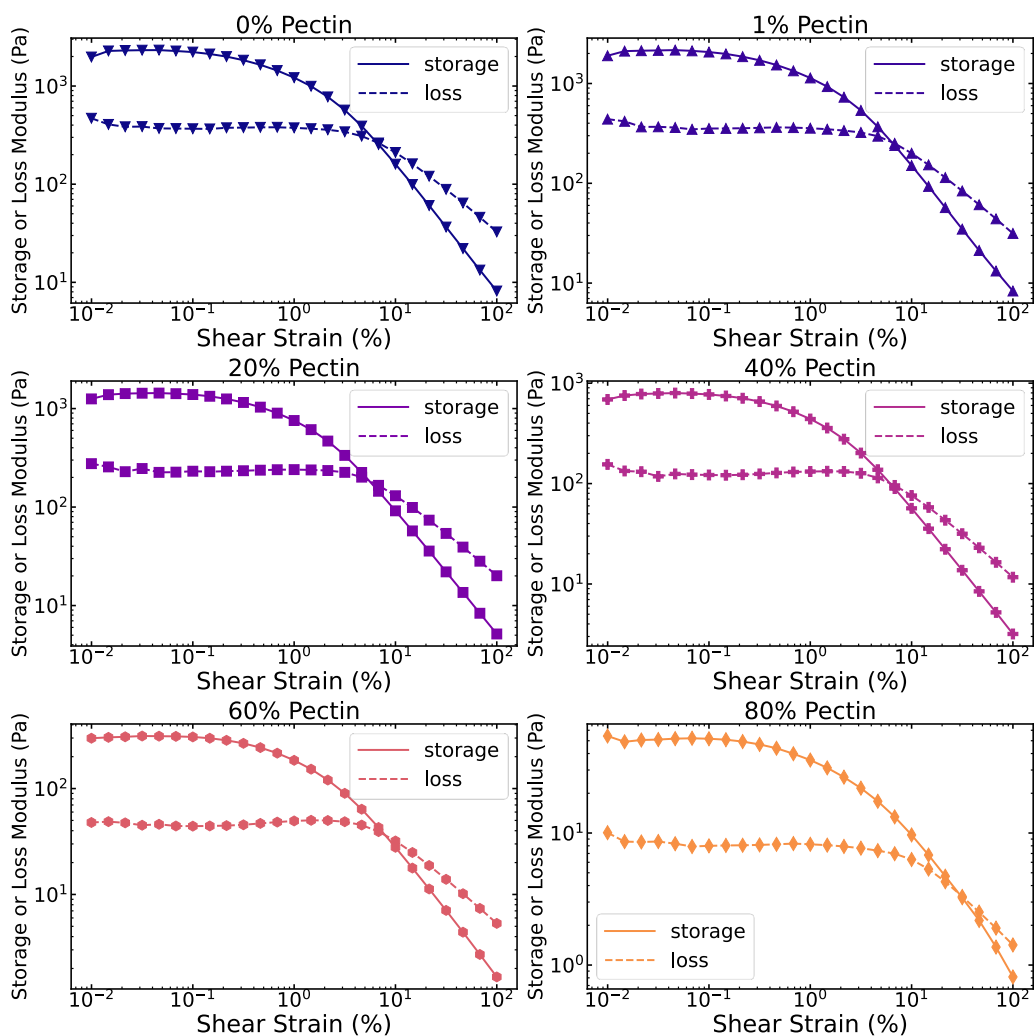

Figure S4: **Amplitude Sweeps of CADES-BC/Pectin Colloids.** Storage and loss modulus curves from the amplitude sweep tests on the CADES-BC/pectin colloids.

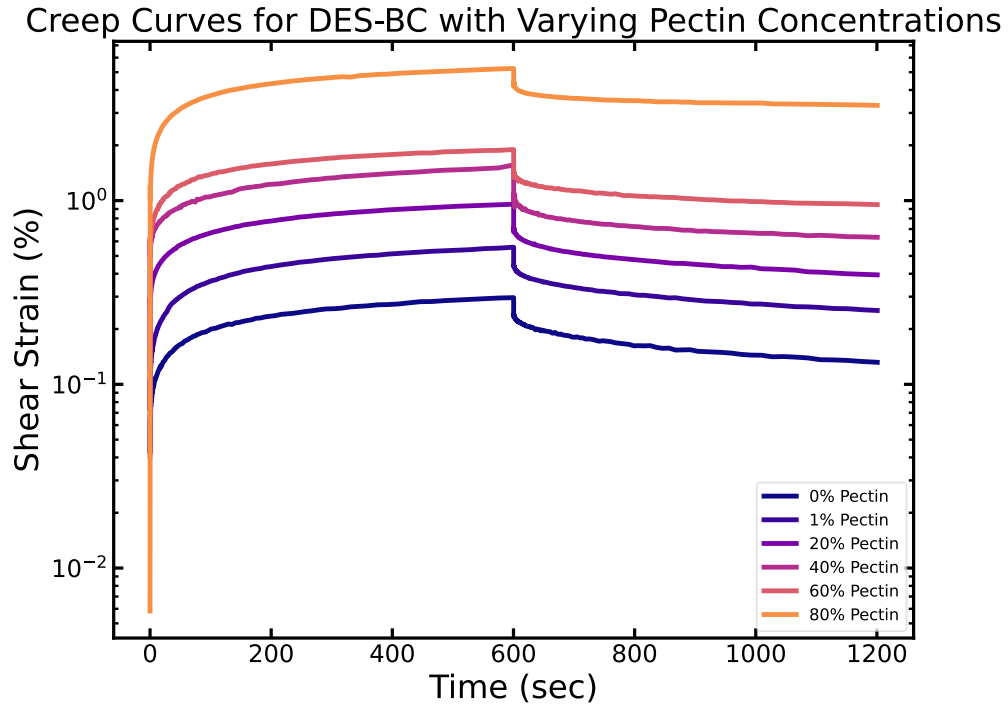

Figure S5: **Creep tests of CADES BC/Pectin Composites** Representative curves for CADES BC samples under rheological creep testing.

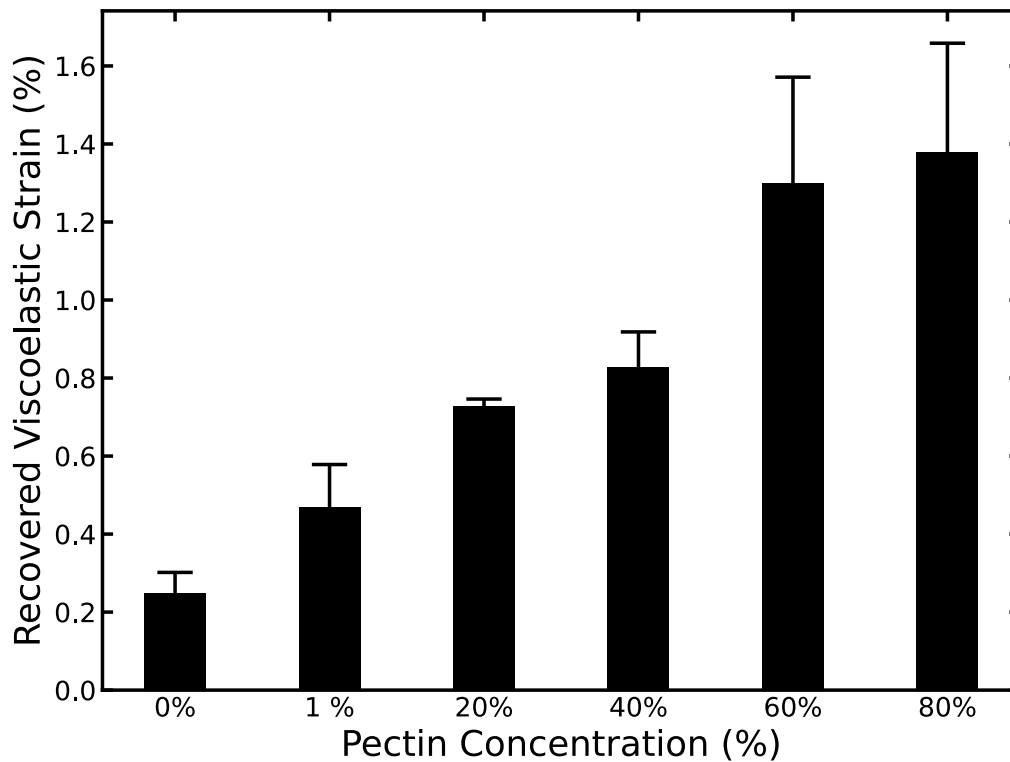

Figure S6: **Recovered Viscoelastic Strain.** Viscoelastic strain recovered during creep-recovery tests of CADES-BC/Pectin colloids.

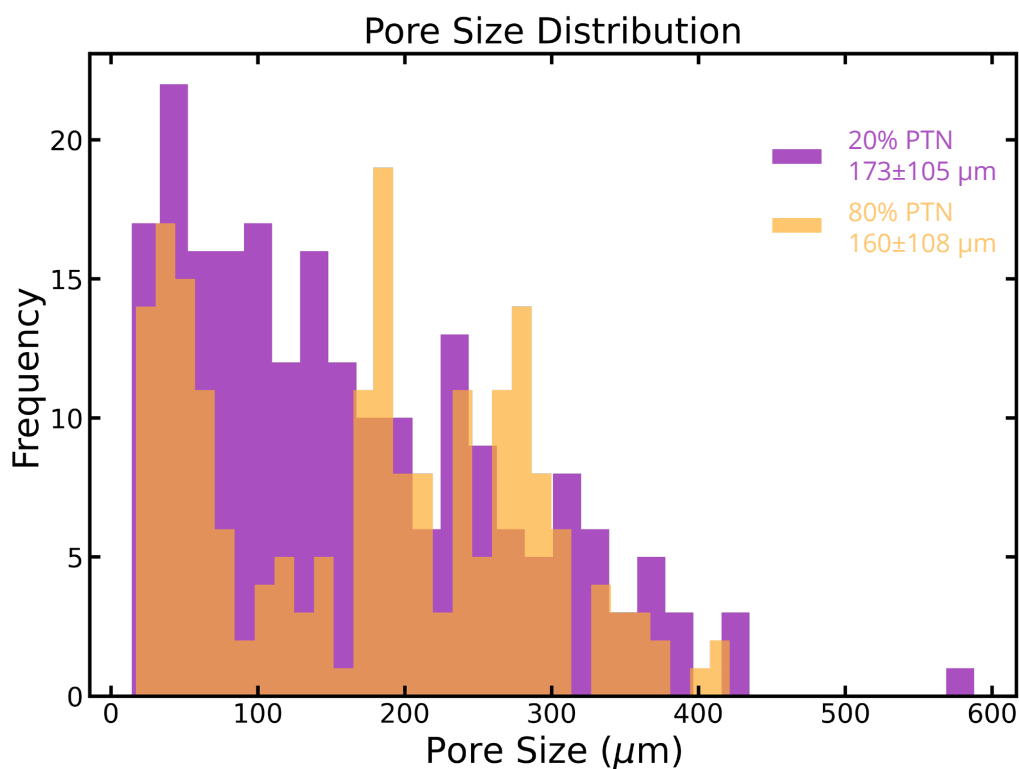

Figure S7: **Pore size distributions for CADES-PTN Composites** Histograms of the pore size distributions of CADES-PTN composites at 20%/80% and 80%/20% concentrations.



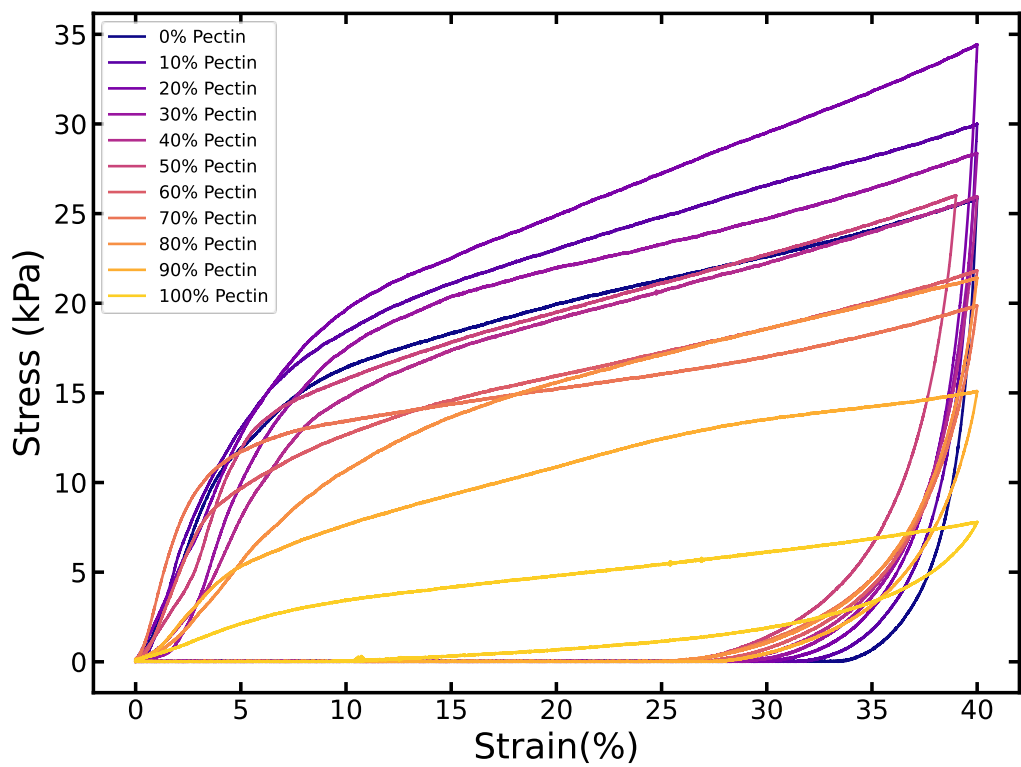

Figure S8: **Pectin sweep stress-strain curves** Representative stress-strain curves of CADES BC/pectin composites.

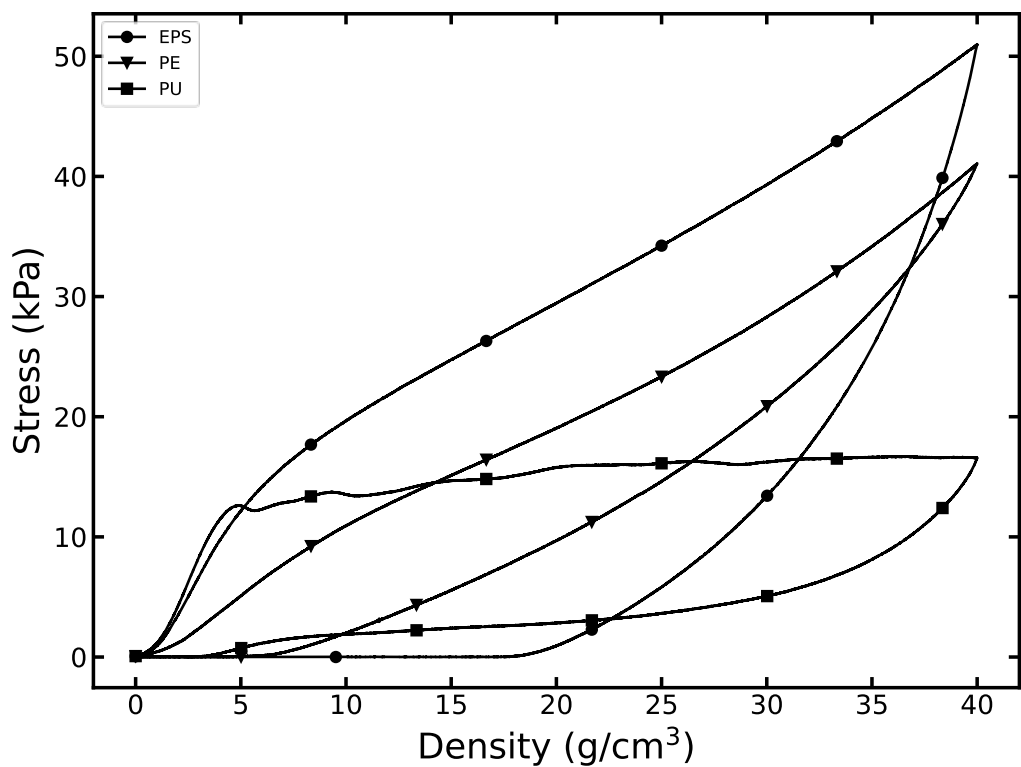

Figure S9: **Commercial polymer stress-strain curves** Representative stress-strain curves of expanded polystyrene, polyethylene, and polyurethane foams.

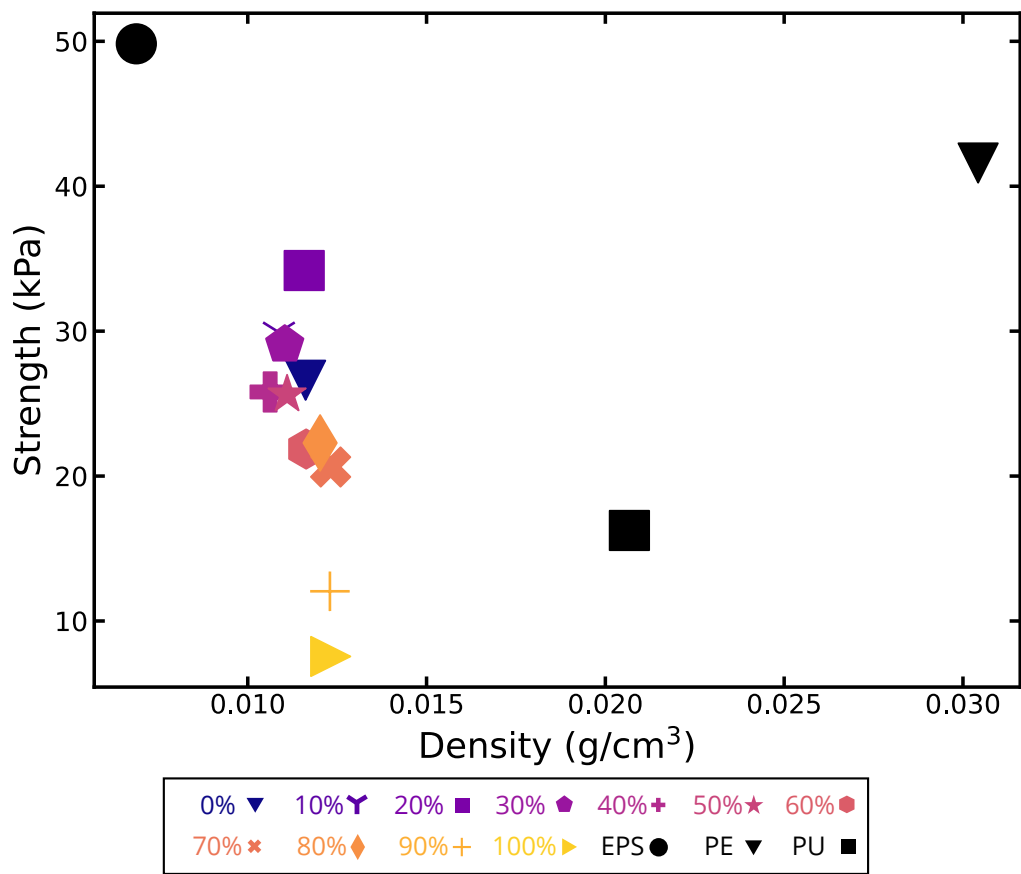

Figure S10: **Strength at 40% strain vs density** A comparison of the compressive strength at 40% strain vs density of the BC/pectin foams and the synthetic polymer foams.

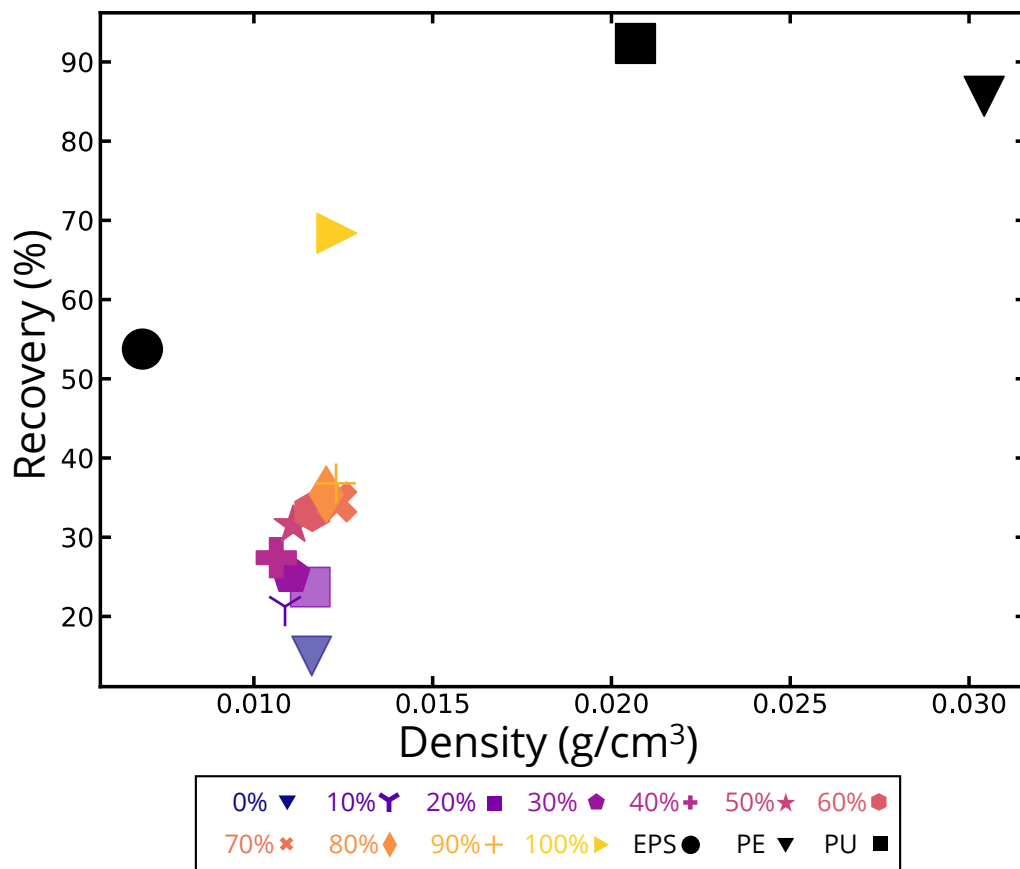

Figure S11: **Recovery vs density** A comparison of the recovery vs density of the BC/pectin foams and the synthetic polymer foams.
